# Supplementary material
Source: publisher site journal article supplement (https://www.dovepress.com/article/457581)
Supplement: Supplementary file 1 [file get_supplementary_file.php]

## Appendix 1. Interview Script

### CFC Team Meeting Interview Guide

#### Introduction

Read consent script and obtain verbal consent from participant to video record the interview before proceeding. Verbalize that the participant agreed to the recording once you have started recording. Introduce the project –The purpose of this interview is to evaluate team functioning during multidisciplinary craniofacial center team meetings. This interview is meant to be semi-structured and open ended. The interview should take 30 – 45 minutes.

What is your discipline/role within your team:

Years in that role:

What would you describe as the primary role of the team meeting?

What factors are most important to the success of the team meeting?

#### Logistics

What disciplines are represented on your team?

How frequently does your team meet?

What has been the medium of your meetings for the last 6 months? (in-person, virtual, combo?) And for a year ago?

On average, how long are your team meetings and how many cases are discussed per meeting?

Does one discipline/person lead the meeting or is there an alternating lead?

If anything, what slows down your meetings?

How are the team's recommendations communicated to the patient/family? (*face-to-face, phone, written, combination of above?*)

#### Case Presentations

How are case presentations ordered? By appointment time, complexity, or other?

Describe a typical case discussion in your team meeting. (*ex – standardized order of info presented?, disciplines that contribute?, radiographs displayed?, etc.*)

For the following questions please consider the usefulness of presenting the info during the team meeting:

- What portions of the patient's history is important to present?
- What psychosocial factors are important to present?
- Is it important to present the patient/family's *opinions* on progress and/or treatment?
  - Does your team routinely elicit these opinions and how so?
- When is it important to display radiographs?
- Anything else important to present?

What is most important for your discipline to present on every patient during team meetings?

Do you have any suggestions to improve patient presentations?

### **Decision-making**

How do multidisciplinary team meetings affect the quality of clinical decisions?

Are there times when sub-optimal decisions are made? Why do you think this happens?

Generally, what factors does your discipline consider in decision-making regarding a patient's treatment plan?

How are patient preferences incorporated into the team discussion?

How much of decision-making happens outside the meeting?

What could be improved about the way decisions are made in your team meetings?

### **Team Processes**

What is the atmosphere like in your team meetings and what do you think creates this atmosphere?

How do different professional groups interact in the team? Is the input of each discipline weighted equally?

How does diversity among your team members affect case discussions?

What happens when people disagree?

How does a team member's absence affect decision-making during the team meeting?

Can you think of anything that would improve team functioning during your team meetings?

### **Community Support**

*For the following questions consider the patient's community support system – local care providers, teachers, friends, family, etc..*

How does your discipline interface with the patient's community/local resources?

How does the team promote the understanding of, and sensitivity to, the needs of patients with craniofacial differences to the patient's support system?

Is there a place for input from the patient's community support system in team meetings?

### **Videoconferencing**

Do you prefer the video conferencing format to face to face meetings when social distancing is required? To face to face meetings when social distancing is not required? Why/why not?

How does video conferencing affect communication, negatively or positively, compared to face to face meetings?

*If not mentioned in answer above - Do any problems with the videoconferencing technology occur and affect your meetings? (Can you give examples?)*

**Closing**

Is there anything you would change about your team meetings?

**Appendix 2.1 Self-Evaluation Instrument for Optimal Multidisciplinary Craniofacial Meetings: Case Evaluation Guide** – created based on responses from interviewees. Intended to evaluate and improve individual case discussions during craniofacial team meetings.

| <b>Self-Evaluation Instrument for Optimal Multidisciplinary Craniofacial Team Meetings: Case Evaluation Guide</b>                                                                                                                                                                                                                                                                                                                                                                                                                                                                |                                                                                                                                                                                                                                                                                                                                                                                                                                                                                                                 |                                                                                                                                                                                                                                                                                                                                                                                                                                                                                         |
|----------------------------------------------------------------------------------------------------------------------------------------------------------------------------------------------------------------------------------------------------------------------------------------------------------------------------------------------------------------------------------------------------------------------------------------------------------------------------------------------------------------------------------------------------------------------------------|-----------------------------------------------------------------------------------------------------------------------------------------------------------------------------------------------------------------------------------------------------------------------------------------------------------------------------------------------------------------------------------------------------------------------------------------------------------------------------------------------------------------|-----------------------------------------------------------------------------------------------------------------------------------------------------------------------------------------------------------------------------------------------------------------------------------------------------------------------------------------------------------------------------------------------------------------------------------------------------------------------------------------|
| <b>Case Presentation</b>                                                                                                                                                                                                                                                                                                                                                                                                                                                                                                                                                         |                                                                                                                                                                                                                                                                                                                                                                                                                                                                                                                 |                                                                                                                                                                                                                                                                                                                                                                                                                                                                                         |
| <b>History</b>                                                                                                                                                                                                                                                                                                                                                                                                                                                                                                                                                                   | <b>Current Context</b>                                                                                                                                                                                                                                                                                                                                                                                                                                                                                          | <b>Guiding Goal/Specific Question</b>                                                                                                                                                                                                                                                                                                                                                                                                                                                   |
| <ul style="list-style-type: none"> <li><input type="checkbox"/> Age</li> <li><input type="checkbox"/> Primary diagnosis</li> <li><input type="checkbox"/> Significant medical history including underlying syndrome(s)</li> <li><input type="checkbox"/> Craniofacial procedures + other pertinent surgical history if present</li> <li><input type="checkbox"/> Any intervention requiring revisions/takeback</li> <li><input type="checkbox"/> Any intervention performed outside of current institution</li> <li><input type="checkbox"/> Concerns from last visit</li> </ul> | <ul style="list-style-type: none"> <li><input type="checkbox"/> Current stage of development/phase of care</li> <li><input type="checkbox"/> Current patient/family concerns</li> <li><input type="checkbox"/> Current symptoms and related studies to review</li> <li><input type="checkbox"/> Brief intro to major psychosocial considerations (financial hardship, geographic difficulty with treatment adherence, surgical trauma)</li> </ul>                                                               | <ul style="list-style-type: none"> <li><input type="checkbox"/> Ex: Does this patient need speech surgery now or further optimization of medical interventions?</li> <li><input type="checkbox"/> If known, provide perspective on the guiding goal/specific question</li> </ul>                                                                                                                                                                                                        |
|                                                                                                                                                                                                                                                                                                                                                                                                                                                                                                                                                                                  |                                                                                                                                                                                                                                                                                                                                                                                                                                                                                                                 | <ul style="list-style-type: none"> <li><input type="checkbox"/> <i>Displayed photo of patient and/or family during presentation if available</i></li> </ul>                                                                                                                                                                                                                                                                                                                             |
| <b>Case Discussion</b>                                                                                                                                                                                                                                                                                                                                                                                                                                                                                                                                                           |                                                                                                                                                                                                                                                                                                                                                                                                                                                                                                                 |                                                                                                                                                                                                                                                                                                                                                                                                                                                                                         |
| <b>Patient Perspective</b>                                                                                                                                                                                                                                                                                                                                                                                                                                                                                                                                                       | <b>Psychosocial Context</b>                                                                                                                                                                                                                                                                                                                                                                                                                                                                                     | <b>Allied Health Updates &amp; Recommendations</b>                                                                                                                                                                                                                                                                                                                                                                                                                                      |
| <ul style="list-style-type: none"> <li><input type="checkbox"/> Preferences and values</li> <li><input type="checkbox"/> Concerns</li> <li><input type="checkbox"/> Opinion on progress and treatments thus far</li> </ul>                                                                                                                                                                                                                                                                                                                                                       | <ul style="list-style-type: none"> <li><input type="checkbox"/> Social considerations such as barriers to care, geographic challenges, etc.</li> <li><input type="checkbox"/> Psychiatric considerations such as diagnoses, surgical trauma, etc.</li> <li><input type="checkbox"/> Current or upcoming significant life events (i.e. tournament, parents divorcing, etc.)</li> <li><input type="checkbox"/> Relevant input from patient's support system (teachers, faith system, counselors, etc.)</li> </ul> | <ul style="list-style-type: none"> <li><input type="checkbox"/> Care received since last clinic visit and/or team meeting<br/>*For each allied health discipline on the team</li> <li><input type="checkbox"/> Review of relevant physical exam, labs, imaging, studies</li> <li><input type="checkbox"/> Any local provider progress or recommendations</li> <li><input type="checkbox"/> Recommendation to address current symptoms/progress through current phase of care</li> </ul> |

| Case Discussion Cont.                                                                                                                                                                                                                                                                                                                                                                                                                                                          |                                                                                                                                                                                                                                                                                                                                                                                                                           |                                                                                                                                                                                                                                                                                                                                                                                                                         |
|--------------------------------------------------------------------------------------------------------------------------------------------------------------------------------------------------------------------------------------------------------------------------------------------------------------------------------------------------------------------------------------------------------------------------------------------------------------------------------|---------------------------------------------------------------------------------------------------------------------------------------------------------------------------------------------------------------------------------------------------------------------------------------------------------------------------------------------------------------------------------------------------------------------------|-------------------------------------------------------------------------------------------------------------------------------------------------------------------------------------------------------------------------------------------------------------------------------------------------------------------------------------------------------------------------------------------------------------------------|
| Medical Updates & Recommendations                                                                                                                                                                                                                                                                                                                                                                                                                                              | Surgical Updates & Recommendations                                                                                                                                                                                                                                                                                                                                                                                        | Dental Updates & Recommendations                                                                                                                                                                                                                                                                                                                                                                                        |
| <ul style="list-style-type: none"> <li><input type="checkbox"/> Medical care received since last clinic visit</li> <li><input type="checkbox"/> Review of relevant physical exam, labs, imaging, studies</li> <li><input type="checkbox"/> Any local provider progress or recommendations</li> <li><input type="checkbox"/> Recommendation to address current symptoms/progress through current phase of care</li> </ul>                                                       | <ul style="list-style-type: none"> <li><input type="checkbox"/> Surgical care received since last clinic visit</li> <li><input type="checkbox"/> Review of relevant physical exam, labs, imaging, studies</li> <li><input type="checkbox"/> Any local provider progress or recommendations</li> <li><input type="checkbox"/> Recommendation to address current symptoms/progress through current phase of care</li> </ul> | <ul style="list-style-type: none"> <li><input type="checkbox"/> Dental care received since last clinic visit</li> <li><input type="checkbox"/> Review of relevant physical exam, labs, imaging, studies</li> <li><input type="checkbox"/> Any local provider progress or recommendations</li> <li><input type="checkbox"/> Recommendation to address current symptoms/progress through current phase of care</li> </ul> |
| Case Summary                                                                                                                                                                                                                                                                                                                                                                                                                                                                   | Comments                                                                                                                                                                                                                                                                                                                                                                                                                  |                                                                                                                                                                                                                                                                                                                                                                                                                         |
| <ul style="list-style-type: none"> <li><input type="checkbox"/> Clear and concise verbalization of plan including final plans from all disciplines; giving attention to the sequence and timing of recommended treatments</li> <li><input type="checkbox"/> Verbalization of how the proposed plan interfaces with the patient perspective</li> <li><input type="checkbox"/> Team has considered how plan will be communicated to family &amp; local care providers</li> </ul> |                                                                                                                                                                                                                                                                                                                                                                                                                           |                                                                                                                                                                                                                                                                                                                                                                                                                         |

**Appendix 2.2 Self-Evaluation Instrument for Optimal Multidisciplinary Craniofacial Meetings: Meeting Evaluation Guide** – created based on responses from interviewees. Intended to evaluate and improve individual craniofacial team meetings as a whole.

| <b>Self-Evaluation Instrument for Optimal Multidisciplinary Craniofacial Team Meetings: Meeting Evaluation Guide</b>                                                                                                                                                                                                                                                                                                                                                                                                                                                                                                                                                                                                                                                                                                                                                                                                                                                                                                                                                                                                                                               |                                                                                                                                                                                                                                                                                                                                                                                                                                                                                                                                                                                                                                                                                                                                                                                                                                                               |                                                                                                                                                                                                                                                                                                                                                                                                                                                                                                                                                                                                                                                                                                                                                                                                                                                                                                                                                                                                                                                                                                                                                                              |
|--------------------------------------------------------------------------------------------------------------------------------------------------------------------------------------------------------------------------------------------------------------------------------------------------------------------------------------------------------------------------------------------------------------------------------------------------------------------------------------------------------------------------------------------------------------------------------------------------------------------------------------------------------------------------------------------------------------------------------------------------------------------------------------------------------------------------------------------------------------------------------------------------------------------------------------------------------------------------------------------------------------------------------------------------------------------------------------------------------------------------------------------------------------------|---------------------------------------------------------------------------------------------------------------------------------------------------------------------------------------------------------------------------------------------------------------------------------------------------------------------------------------------------------------------------------------------------------------------------------------------------------------------------------------------------------------------------------------------------------------------------------------------------------------------------------------------------------------------------------------------------------------------------------------------------------------------------------------------------------------------------------------------------------------|------------------------------------------------------------------------------------------------------------------------------------------------------------------------------------------------------------------------------------------------------------------------------------------------------------------------------------------------------------------------------------------------------------------------------------------------------------------------------------------------------------------------------------------------------------------------------------------------------------------------------------------------------------------------------------------------------------------------------------------------------------------------------------------------------------------------------------------------------------------------------------------------------------------------------------------------------------------------------------------------------------------------------------------------------------------------------------------------------------------------------------------------------------------------------|
| <b>Team Dynamics</b>                                                                                                                                                                                                                                                                                                                                                                                                                                                                                                                                                                                                                                                                                                                                                                                                                                                                                                                                                                                                                                                                                                                                               | <b>Discussion Leader</b>                                                                                                                                                                                                                                                                                                                                                                                                                                                                                                                                                                                                                                                                                                                                                                                                                                      | <b>Virtual Format</b>                                                                                                                                                                                                                                                                                                                                                                                                                                                                                                                                                                                                                                                                                                                                                                                                                                                                                                                                                                                                                                                                                                                                                        |
| <p><b>Team displayed most of the following behaviors throughout the meeting:</b></p> <ul style="list-style-type: none"> <li><input type="checkbox"/> Established welcoming environment by encouraging all to participate</li> <li><input type="checkbox"/> Remained engaged while others contributed to discussion</li> <li><input type="checkbox"/> Demonstrated some enjoyment in participating</li> <li><input type="checkbox"/> Exhibited respectful communication</li> <li><input type="checkbox"/> Handled criticisms/disagreements in a professional manner</li> <li><input type="checkbox"/> Maintained efficiency</li> <li><input type="checkbox"/> Sought diverse opinions to contribute to group discussion</li> <li><input type="checkbox"/> Demonstrated some understanding and gratefulness of the roles fulfilled by colleagues</li> <li><input type="checkbox"/> Team members displayed preparedness by appearing to have reviewed cases prior to meeting, brought and knew how to display relevant supplemental media (radiographs, video, etc.), anticipated absentees adequately communicated recommendations to present team member</li> </ul> | <p><b>Lead efficient discussion:</b></p> <ul style="list-style-type: none"> <li><input type="checkbox"/> Provided organized and concise presentation</li> <li><input type="checkbox"/> Focused the meeting on patient specific concerns (discouraging discussion of administrative concerns or academic and social minutia not contributing to patient care)</li> </ul> <p><b>Encouraged equality among disciplines:</b></p> <ul style="list-style-type: none"> <li><input type="checkbox"/> Encouraged all disciplines to contribute</li> <li><input type="checkbox"/> Prevented any one team member from dominating the conversation</li> <li><input type="checkbox"/> Established environment where all felt comfortable expressing their opinions</li> <li><input type="checkbox"/> Recognized and shut down minimization of other disciplines</li> </ul> | <p><b>Team optimized the virtual format by displaying most of the following behaviors:</b></p> <ul style="list-style-type: none"> <li><input type="checkbox"/> Optimized how they are displayed: camera on and framed to have the participant's head and shoulders centered in view, room lighting supports view of participant's face, professional background (measures taken to use a neutral background with use of virtual background or blur feature if necessary or preferred)</li> <li><input type="checkbox"/> Optimized their audio: sitting in close proximity to microphone, use of headphones if background noise is expected, adjusts volume on their own computer for other loud/quiet speakers but quickly comments in the chat if having difficulty hearing another speaker</li> <li><input type="checkbox"/> Technological mishaps did not appear to slow progression of the meeting</li> <li><input type="checkbox"/> Methods of nonverbal engagement (chat feature, icons) were utilized to facilitate a seamless flow of conversation (speaker periodically checks the chat and/or an individual may have been assigned to monitor the chat)</li> </ul> |

| Team Dynamics Cont.                                                                                                                                                                                                                                                                                                                                                                                                                                                                                                                                                                                                                     | Discussion Leader Cont.                                                                                                                | Virtual Format Cont.                                                                                                                                                                                                                                                                                                                                                                                                     |
|-----------------------------------------------------------------------------------------------------------------------------------------------------------------------------------------------------------------------------------------------------------------------------------------------------------------------------------------------------------------------------------------------------------------------------------------------------------------------------------------------------------------------------------------------------------------------------------------------------------------------------------------|----------------------------------------------------------------------------------------------------------------------------------------|--------------------------------------------------------------------------------------------------------------------------------------------------------------------------------------------------------------------------------------------------------------------------------------------------------------------------------------------------------------------------------------------------------------------------|
| <p><b>Team avoided display of the following behaviors:</b></p> <ul style="list-style-type: none"> <li><input type="checkbox"/> Inequality among disciplines in contributing to discussion</li> <li><input type="checkbox"/> Multitasking during patient presentations</li> <li><input type="checkbox"/> Allowed one strong voice to dominate and dismantle healthy discussion</li> <li><input type="checkbox"/> Disagreements were minimized without addressing the issue</li> <li><input type="checkbox"/> Team dedicated excessive time to discussing a decision that could not be made without absent team member's input</li> </ul> | <ul style="list-style-type: none"> <li><input type="checkbox"/> <b>Synthesized information and verbally summarized plan</b></li> </ul> | <ul style="list-style-type: none"> <li><input type="checkbox"/> Team appeared to be familiar with features of their web conferencing platform (mute/unmute easily, transfer of screensharing capability, optimizing view to see team members and presentation screen, etc.)</li> <li><input type="checkbox"/> Team members displayed active listening in the virtual format (gesturing, icons, chat comments)</li> </ul> |
| <p><b>Comments:</b></p>                                                                                                                                                                                                                                                                                                                                                                                                                                                                                                                                                                                                                 |                                                                                                                                        |                                                                                                                                                                                                                                                                                                                                                                                                                          |
